# Supplementary material for: Effect of Silver Nanoparticles on the In Vitro Regeneration, Biochemical, Genetic, and Phenotype Variation in Adventitious Shoots Produced from Leaf Explants in Chrysanthemum
Source: MDPI journal article supplement (doi:10.3390/ijms23137406), 2022-07-03
Supplement: s1 [file s1]

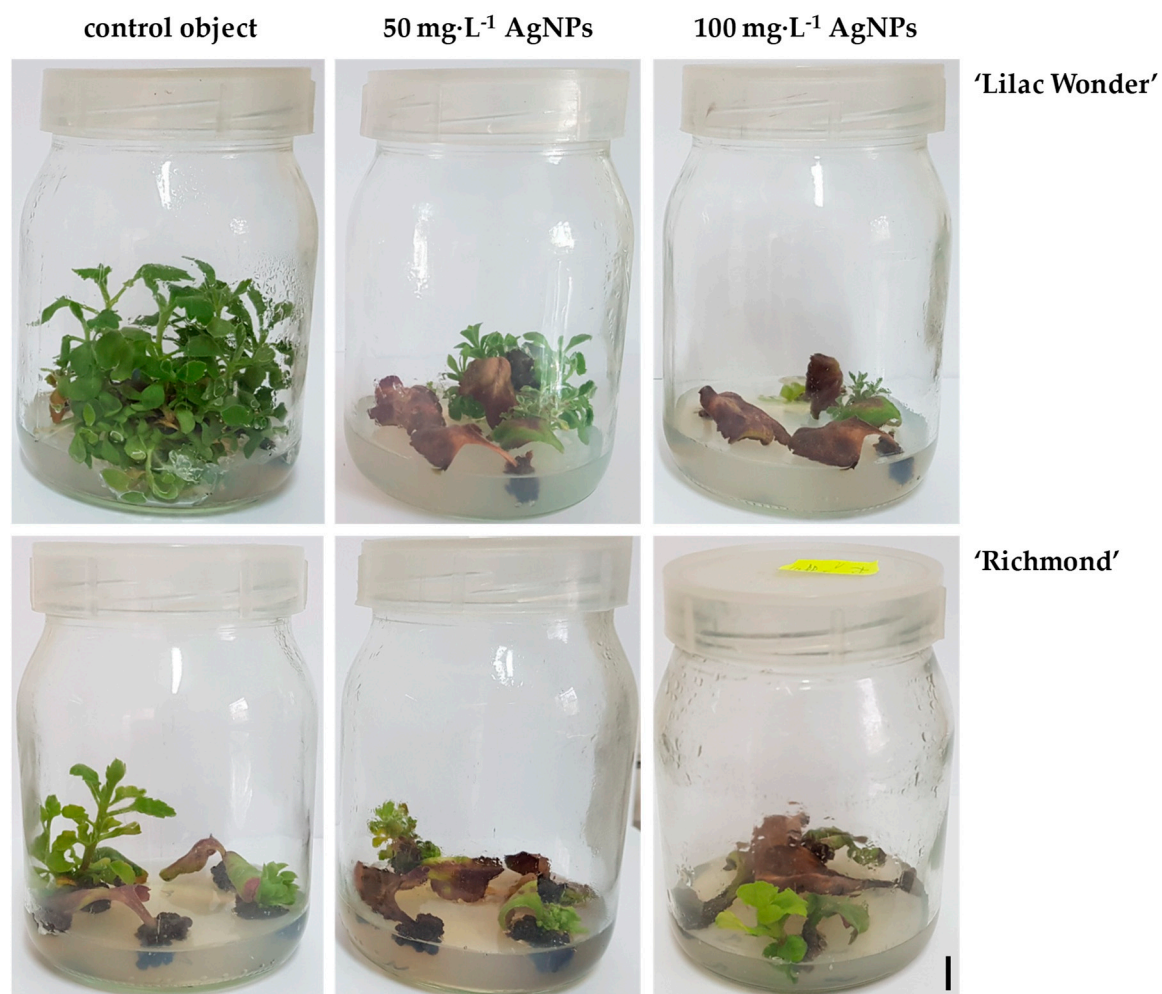

**Figure S1.** Adventitious shoots regeneration on the inoculated *Chrysanthemum × grandiflorum* 'Lilac Wonder' and 'Richmond' leaf explants cultured on the modified MS medium with 0.6 mg·L<sup>-1</sup> BAP and 2 mg·L<sup>-1</sup> IAA in the ninth week of culture, depending on the AgNPs treatment (0–100 mg·L<sup>-1</sup>); bar = 1 cm.

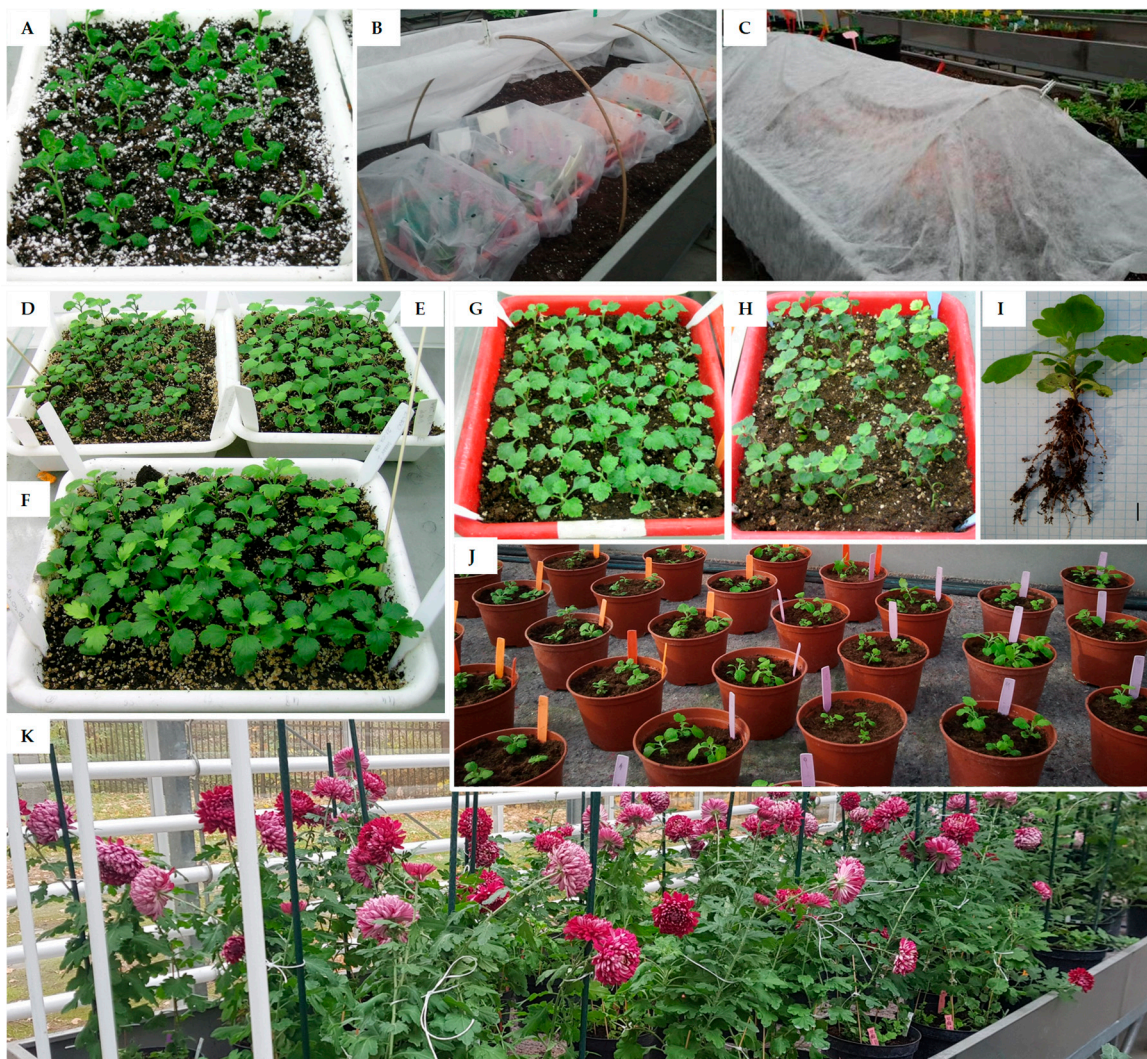

**Figure S2.** Acclimatization and *ex vitro* growth in greenhouse of *Chrysanthemum* × *grandiflorum* 'Lilac Wonder' and 'Richmond' tested plants: *in vitro*-rooted microshoots planted to plastic trays filled with a mixture of peat substrate and perlite (A); microshoots covered with perforated transparent foil (B) and geo-cover (C) during acclimatization; acclimatized 'Lilac Wonder' plants depending on the AgNPs treatment: control (D), 50 mg·L<sup>-1</sup> AgNPs (E), and 100 mg·L<sup>-1</sup> AgNPs (F); acclimatized control 'Richmond' plants (G); acclimatized 50 mg·L<sup>-1</sup> AgNPs-treated 'Richmond' plants (H); acclimatized 100 mg·L<sup>-1</sup> AgNPs-treated 'Richmond' plant (I); plants transferred after acclimatization to plastic pots for further cultivation (J); plants at the full flowering stage (K); bar = 1 cm.

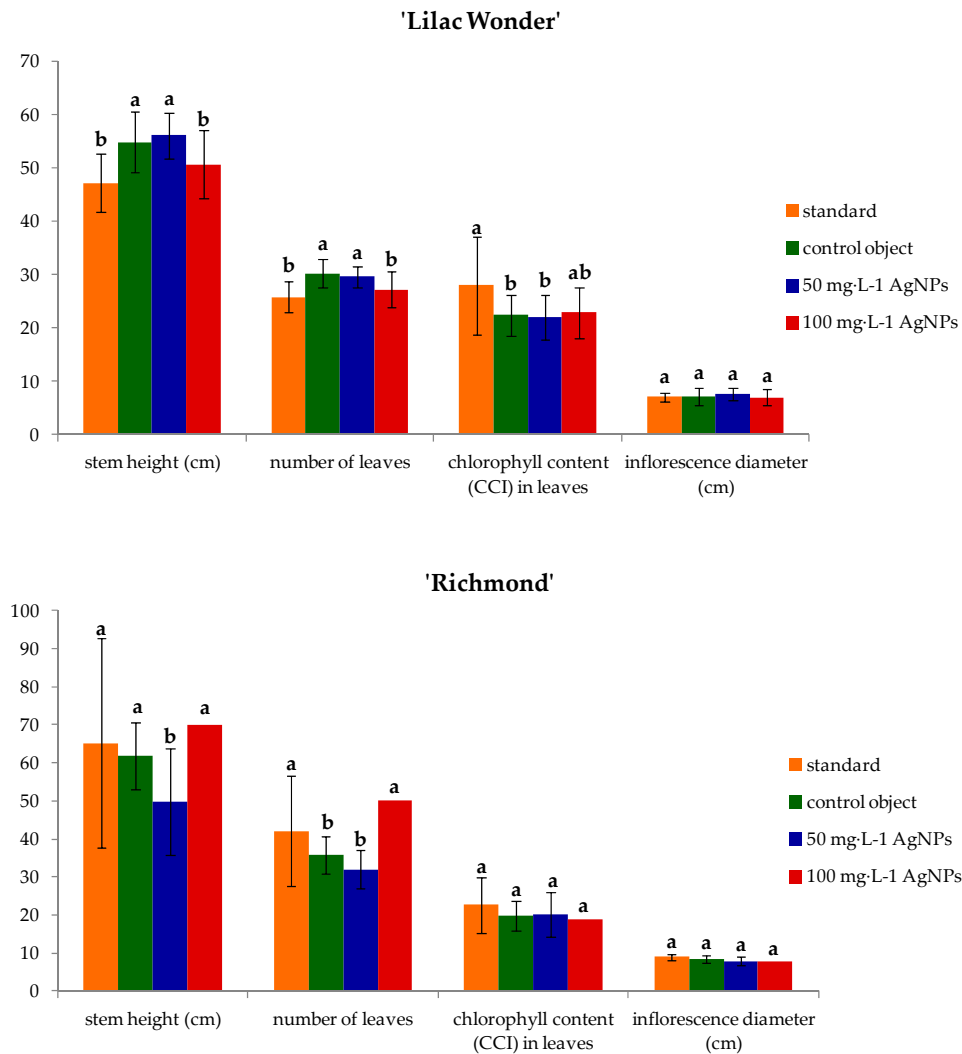

**Figure S3.** Biometric parameters and chlorophyll content of standard plants and *ex vitro*-cultivated adventitious shoots of *Chrysanthemum × grandiflorum* 'Lilac Wonder' and 'Richmond' regenerated from leaf explants cultured *in vitro* on the modified MS medium with 0.6 mg·L<sup>-1</sup> BAP and 2 mg·L<sup>-1</sup> IAA, depending on the AgNPs treatment (0–100 mg·L<sup>-1</sup>). Means ± SD on graphs for each cultivar tested followed by the same letter do not differ significantly at  $p \leq 0.05$  (Tukey's test). Standard – plants propagated by the single node method on the PGRs-free medium. Control object – adventitious shoots regenerated on the AgNPs-free medium.

**Table S1.** Analysis of molecular variance (AMOVA) in the two studied chrysanthemum cultivars.

| Source of variation    | 'Lilac Wonder' |        | 'Richmond' |       |
|------------------------|----------------|--------|------------|-------|
|                        | RAPD           | SCoT   | RAPD       | SCoT  |
| Among Populations [%]  | 1              | 0      | 32         | 10    |
| Within populations [%] | 99             | 100    | 68         | 90    |
| $\Phi_{PT}$            | 0.012          | -0.029 | 0.325      | 0.104 |
